# Supplementary material
Source: PubMed Central journal article supplement (PMC7309352)
Supplement: NIHMS1585825-supplement-2.pdf [file NIHMS1585825-supplement-2.pdf]

**Table S1.** Longitudinal analysis of neutralizing antibody titers in selected cohort participants.

| <b>985</b>         |       |            |            |      |      |      |             |             |      |            |      |
|--------------------|-------|------------|------------|------|------|------|-------------|-------------|------|------------|------|
| Year               |       | 2004       | 2005       | 2006 | 2007 | 2008 | 2009        | 2010        | 2011 |            |      |
| NT50               | DENV1 | <10        | <10        | 16   | 26   | 61   | 52          | 25          | 304  |            |      |
|                    | DENV2 | <10        | <10        | 2150 | 1347 | 947  | 1061        | 466         | 1586 |            |      |
|                    | DENV3 | <10        | <10        | 32   | 41   | 58   | 35          | 37          | 887  |            |      |
|                    | DENV4 | <10        | <10        | <10  | <10  | <10  | <10         | <10         | <10  |            |      |
| Infesting serotype |       |            | DENV2      |      |      |      |             | DENV3       |      |            |      |
| Infection outcome  |       |            | Inapparent |      |      |      |             | Symptomatic |      |            |      |
| <b>1791</b>        |       |            |            |      |      |      |             |             |      |            |      |
| Year               |       | 2004       | 2005       | 2006 | 2007 | 2008 | 2009        | 2010        | 2011 |            |      |
| NT50               | DENV1 | <10        | <10        | 30   | 22   | 47   | <10         | 47          | 373  |            |      |
|                    | DENV2 | <10        | <10        | 500  | 304  | 334  | 286         | 243         | 475  |            |      |
|                    | DENV3 | <10        | 74         | 10   | 33   | 97   | 57          | 36          | 849  |            |      |
|                    | DENV4 | <10        | 30         | 18   | 32   | 39   | 65          | 31          | 551  |            |      |
| Infesting serotype |       | DENV2      |            |      |      |      |             | DENV3       |      |            |      |
| Infection outcome  |       | Inapparent |            |      |      |      |             | Symptomatic |      |            |      |
| <b>3243</b>        |       |            |            |      |      |      |             |             |      |            |      |
| Year               |       | 2004       | 2005       | 2006 | 2007 | 2008 | 2009        | 2010        | 2011 | 2012       | 2013 |
| NT50               | DENV1 |            |            |      |      |      | <10         | 65          | 75   | 166        | 814  |
|                    | DENV2 |            |            |      |      |      | <10         | 11          | 26   | 56         | 71   |
|                    | DENV3 |            |            |      |      |      | <10         | 762         | 838  | 1890       | 6258 |
|                    | DENV4 |            |            |      |      |      | <10         | 43          | 23   | 49         | 523  |
| Infesting serotype |       |            |            |      |      |      | DENV3       |             |      | DENV1      |      |
| Infection outcome  |       |            |            |      |      |      | Symptomatic |             |      | Inapparent |      |

**Table S1.** Longitudinal analysis of neutralizing antibody titers in selected cohort participants. Related to Figure 1 Annual samples collected from each of the three participants in this study were used for neutralization assays. A  $\geq 4$ -fold increase in DENV-specific neutralizing antibody titers (NT<sub>50</sub>) in paired annual samples indicates a DENV infection during the study year, as highlighted for DENV1 (orange), DENV2 (yellow) and DENV3 (green). All three donors experienced one symptomatic DENV3 infection, which was also confirmed by RT-PCR/virus isolation.

# Supplementary Table 2 – capture ELISA data and Neut data from all 3 labs for 15 hmAbs

| mAb Clone | Donor ID | Sample Harvest date | IgG sub-class | light chain | ELISA-VUMC (ng/ml)       |                          |                              |                          | NEUT-WUSTL (ng/ml)        |                            |                             |                             | NEUT-UCB (ng/ml) |                 |                              |     | UNC-CH (ng/ml)    |                   |                             |                         |
|-----------|----------|---------------------|---------------|-------------|--------------------------|--------------------------|------------------------------|--------------------------|---------------------------|----------------------------|-----------------------------|-----------------------------|------------------|-----------------|------------------------------|-----|-------------------|-------------------|-----------------------------|-------------------------|
|           |          |                     |               |             | DV1 Thailand /16007/1664 | DV2 Thailand /16681/1664 | DV3 Philippi nes/165 62/1664 | DV4 Indonesi a/1036/1976 | DV1 Nauru/ West Pac/197 4 | DV2 Thailand /S16803 /1974 | DV3 Thailand /CH5348 9/1973 | DV4 Columbi a/TVP- 376/1982 | DV1 DV1 1265-4   | DV2 DV2 N172-06 | DV3 DV3 N2845-09 DV4 N703-99 |     | DV1ic West Pac 74 | DV2ic DV2ic 16803 | DV3ic DV3ic SriLanka 89 III | DV4ic DV4ic SriLanka 92 |
| 66        | 1037     | 2013                | IgG1          | κ           | NB                       | NB                       | 63.2                         | NB                       | NN                        | NN                         | NN                          | NN                          | NN               | NN              | 146.7                        | NN  | NN                | NN                | 66.2                        | NN                      |
| 115       | 1037     | 2013                | IgG1          | λ           | NB                       | NB                       | 106.9                        | NB                       | NN                        | NN                         | 5.5                         | NN                          | NN               | NN              | 87.0                         | NN  | NN                | NN                | 5.5                         | NN                      |
| 144       | 1037     | 2013                | IgG1          | κ           | NB                       | NB                       | 109.1                        | NB                       | 329                       | NN                         | 22.0                        | NN                          | 2951             | NN              | 39.4                         | NN  | NN                | NN                | 18.9                        | NN                      |
| 236       | 985      | 2011                | IgG1          | λ           | NB                       | NB                       | 390.0                        | NB                       | NN                        | NN                         | 9.3                         | NN                          | NN               | NN              | 15.0                         | NN  | NN                | NN                | 390.8                       | NN                      |
| 286       | 1791     | 2011                | IgG1          | κ           | NB                       | NB                       | 286.0                        | NB                       | NN                        | NN                         | 4.4                         | NN                          | NN               | NN              | 18.0                         | NN  | NN                | NN                | 26.3                        | NN                      |
| 290       | 1791     | 2011                | IgG1          | κ           | NB                       | NB                       | 225.0                        | NB                       | NN                        | NN                         | 79.0                        | N/A                         | NN               | NN              | 74.0                         | NN  | NN                | NN                | 4.4                         | NN                      |
| 297       | 1791     | 2011                | IgG1          | λ           | NB                       | NB                       | 142.0                        | NB                       | NN                        | NN                         | 5.3                         | NN                          | NN               | NN              | 21.0                         | NN  | NN                | NN                | 18.2                        | NN                      |
| 298       | 1791     | 2011                | IgG1          | κ           | NB                       | NB                       | 124.0                        | NB                       | NN                        | NN                         | 8.0                         | N/A                         | NN               | NN              | 100.0                        | NN  | NN                | NN                | 22.7                        | NN                      |
| 354       | 1791     | 2011                | IgG1          | κ           | NB                       | NB                       | 91.0                         | NB                       | NN                        | NN                         | 8.1                         | N/A                         | NN               | NN              | 100.0                        | NN  | NN                | NN                | 57.6                        | NN                      |
| 404       | 985      | 2011                | IgG1          | κ           | NB                       | NB                       | 37.3                         | NB                       | NN                        | NN                         | 5.0                         | NN                          | NN               | NN              | 33.0                         | NN  | NN                | NN                | 7.9                         | NN                      |
| 406       | 985      | 2011                | IgG1          | λ           | NB                       | NB                       | 136.0                        | NB                       | NN                        | NN                         | 64.0                        | NN                          | NN               | NN              | 224.0                        | NN  | NN                | NN                | 68.2                        | NN                      |
| 415       | 985      | 2011                | IgG1          | κ           | NB                       | NB                       | 26.2                         | NB                       | NN                        | NN                         | 731.0                       | NN                          | N/A              | N/A             | N/A                          | N/A | NN                | NN                | 57.6                        | NN                      |
| 419       | 985      | 2011                | IgG1          | κ           | NB                       | NB                       | 44.4                         | NB                       | N/A                       | N/A                        | N/A                         | N/A                         | NN               | NN              | 2.8                          | NN  | NN                | NN                | 1.8                         | NN                      |
| 437       | 985      | 2011                | IgG1          | κ           | NB                       | NB                       | 25.8                         | NB                       | NN                        | NN                         | 9.0                         | NN                          | NN               | NN              | 207.0                        | NN  | NN                | NN                | 3.9                         | NN                      |
| 443       | 985      | 2011                | IgG3          | λ           | NB                       | NB                       | 15.1                         | NB                       | NN                        | NN                         | 11.0                        | NN                          | NN               | NN              | 57.0                         | NN  | NN                | NN                | 4.2                         | NN                      |

**Table S2. Capture ELISA and FRNT data. Related to Figure 1 and S1.**

NB = Non Binding  
 NN = Non Neutralizing  
 N/A = Not Attempted

Live-virus capture ELISA EC<sub>50</sub> values were determined at Vanderbilt University Medical Center, Vero-81 cell FRNT EC<sub>50</sub> values for WHO prototype strains for DENV 1-4 were performed at Washington University in St. Louis, U937 neutralization EC<sub>50</sub> values were determined at U.C. Berkeley, and Vero-81 cell FRNT EC<sub>50</sub> value were determined at University of North Carolina-CH.

# Supplementary Figure 1 – DENV3 hmAbs are TS by Capture ELISA

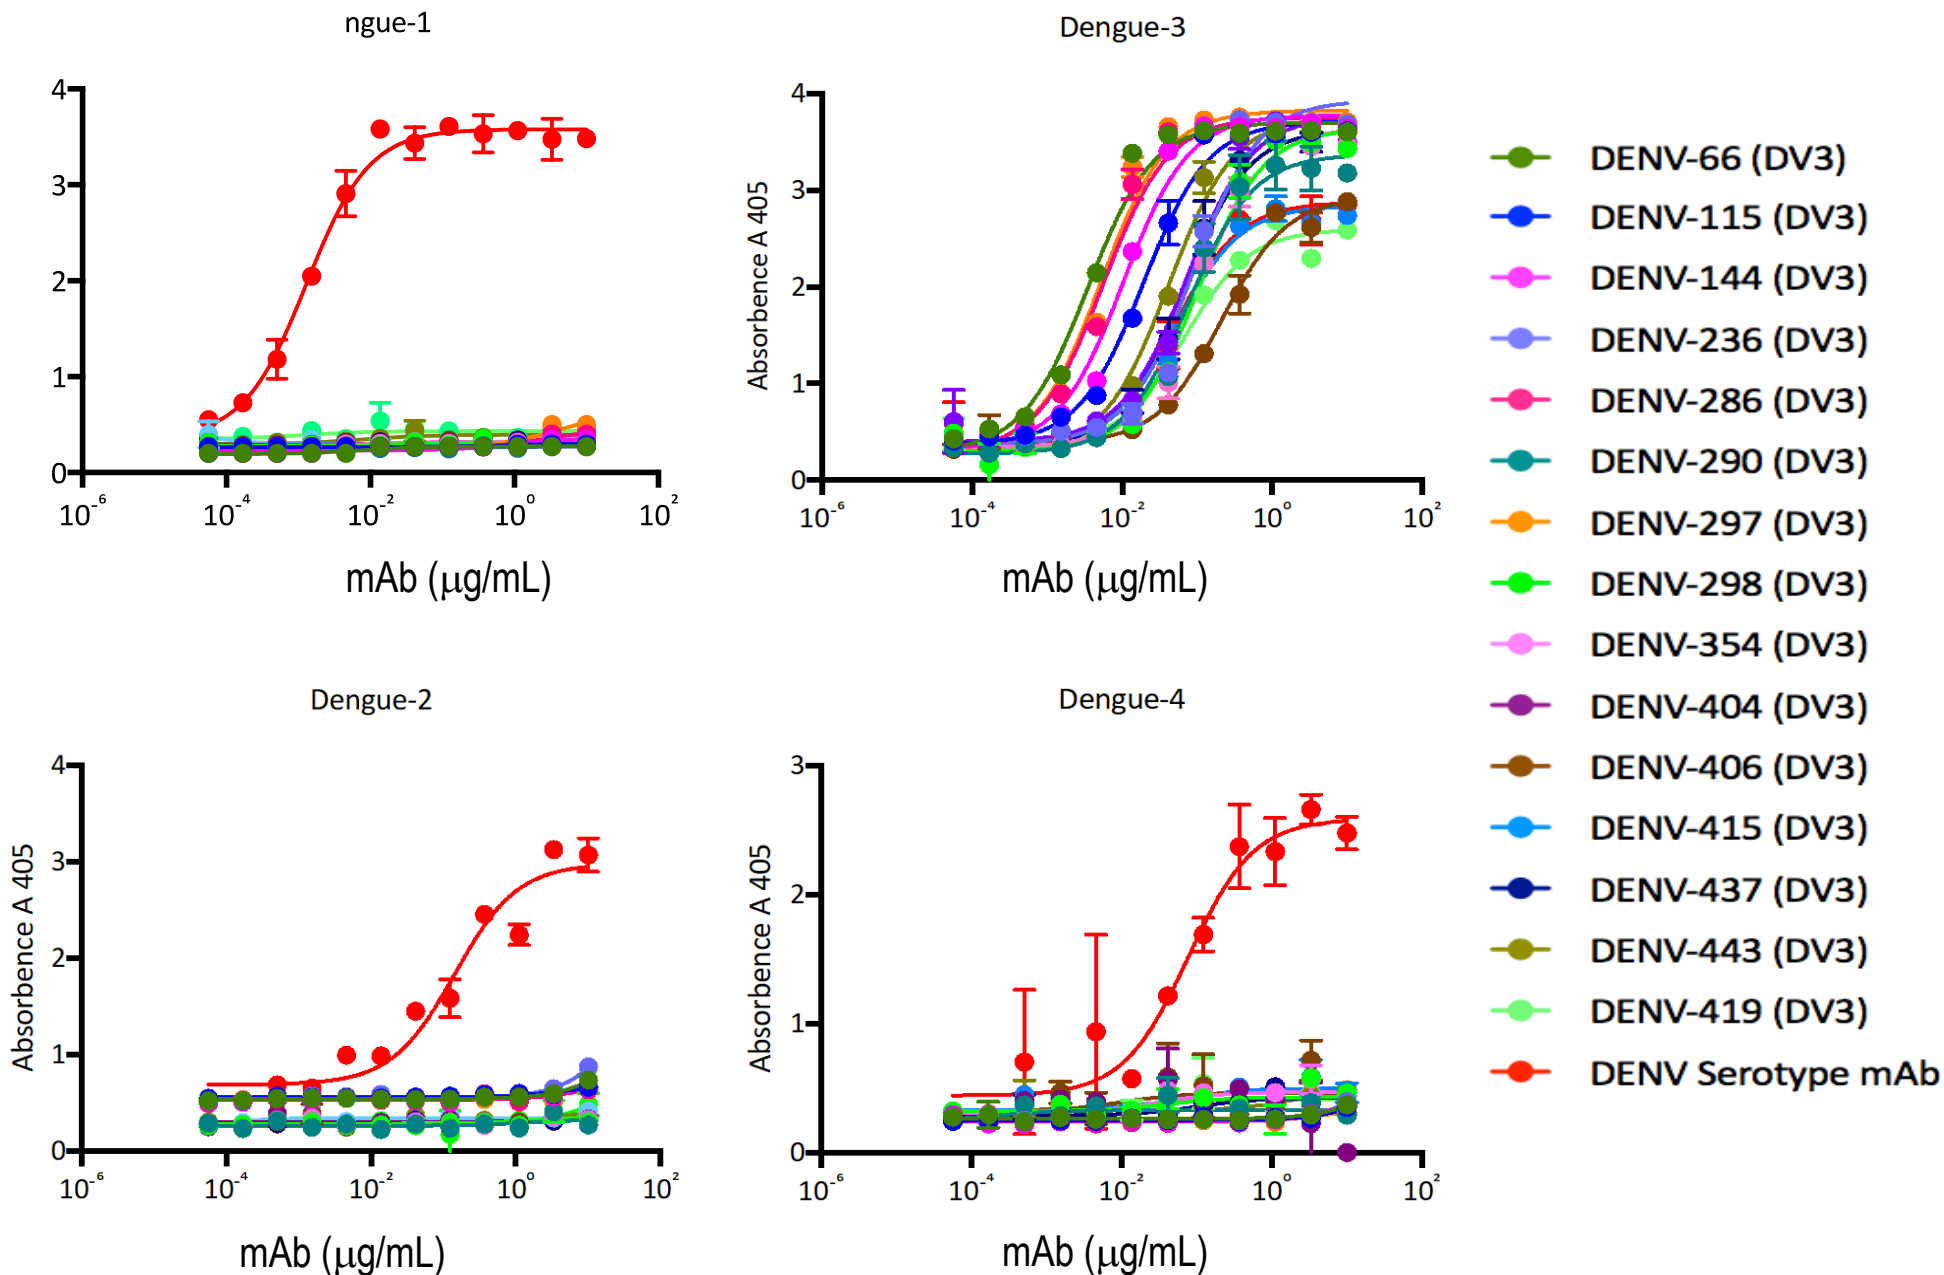

**Figure S1. DENV3 hmAbs are type-specific by capture ELISA. Related to Figure 1 and Supplemental Table 1.**

Binding curves of individual hmAbs to 4G2 captured DENV1, DENV2, DENV3 or DENV4 are shown. DENV Serotype mAb are DENV1-specific hmAb 1F4, DENV2-specific hmAb 2D22, DENV3-specific hmAb 5J7 and DENV4-specific hmAb D4-126 and were used as positive controls.

# Supplemental Figure 2 – Foci on Vero-81 cells

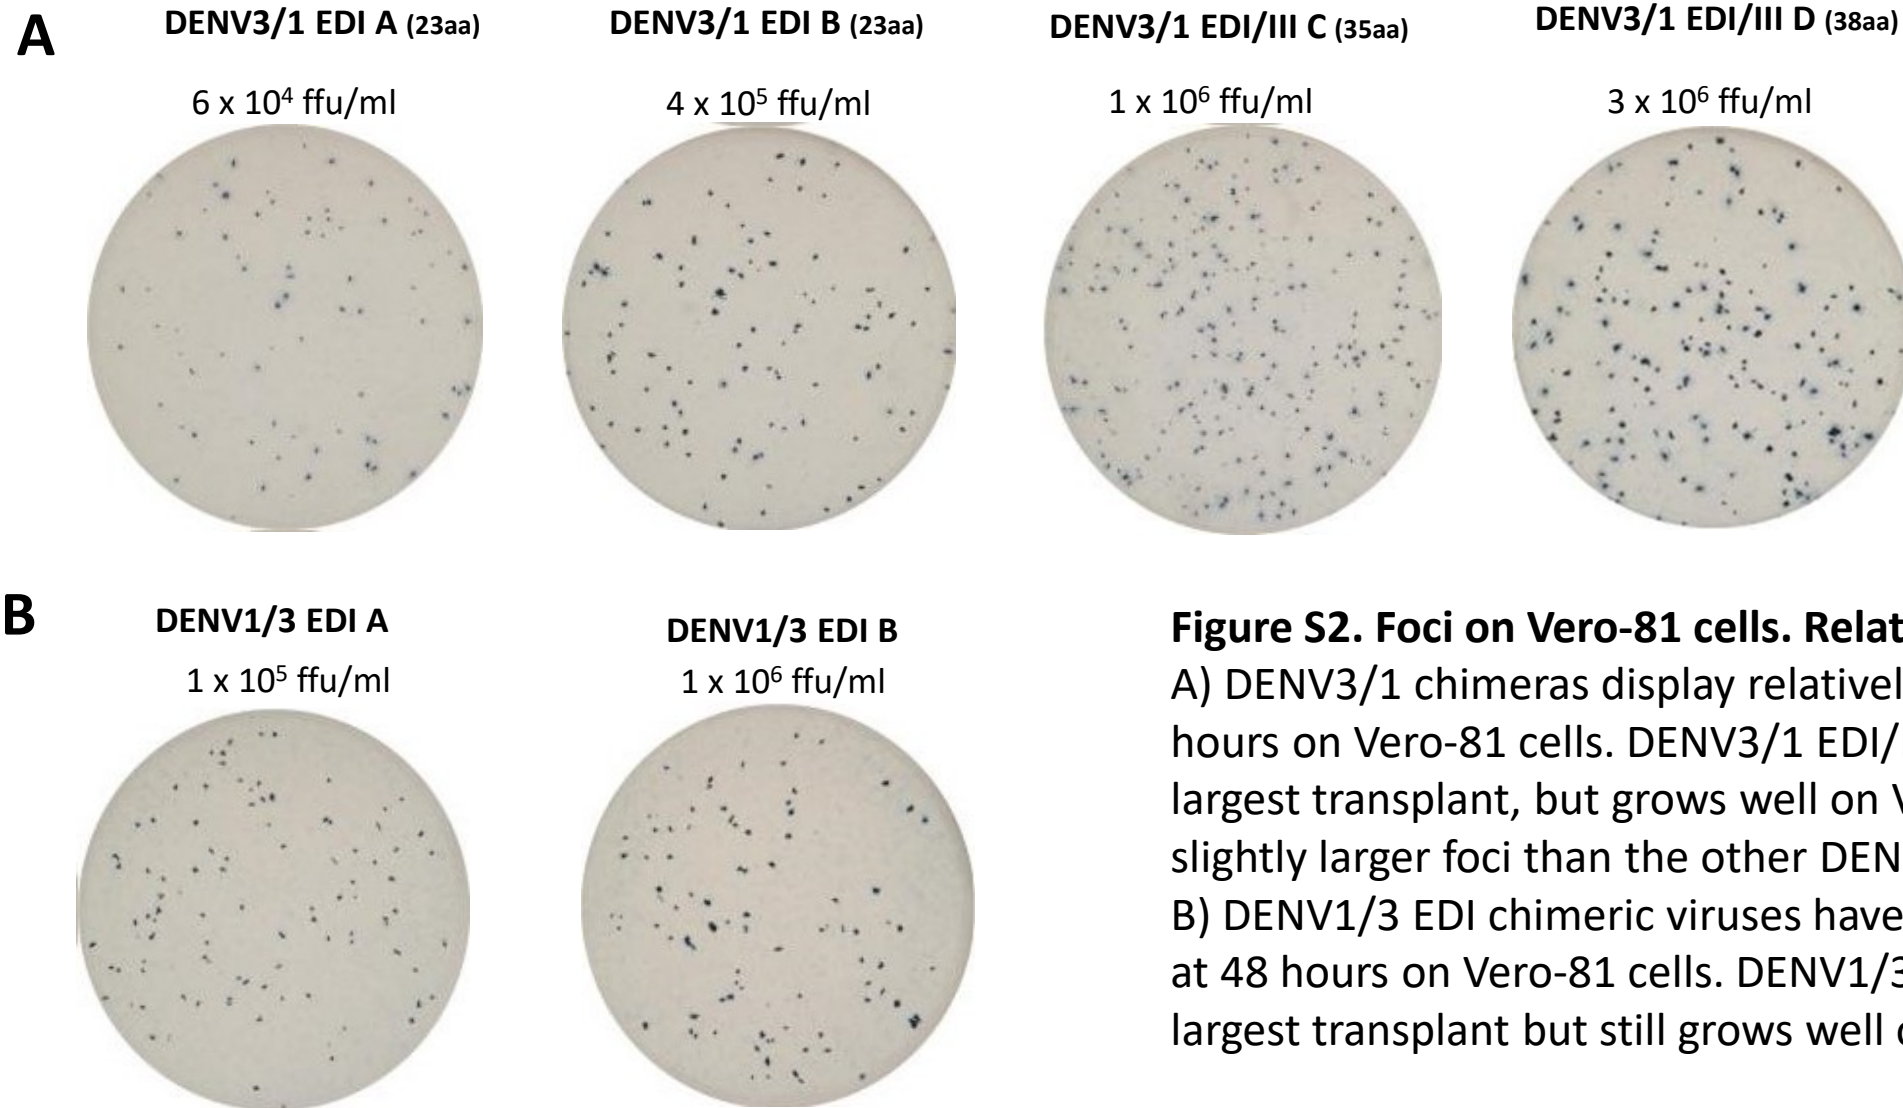

**Figure S2. Foci on Vero-81 cells. Related to Figures 3 and 4.**  
A) DENV3/1 chimeras display relatively similar foci at 48 hours on Vero-81 cells. DENV3/1 EDI/III D contains the largest transplant, but grows well on Vero cells and displays slightly larger foci than the other DENV3/1 chimeric viruses. B) DENV1/3 EDI chimeric viruses have relatively similar foci at 48 hours on Vero-81 cells. DENV1/3 EDI B contains the largest transplant but still grows well on Vero-81 cells.

Supplemental Figure 3 - Neutralization curves for DENV1/3 chimeric viruses.

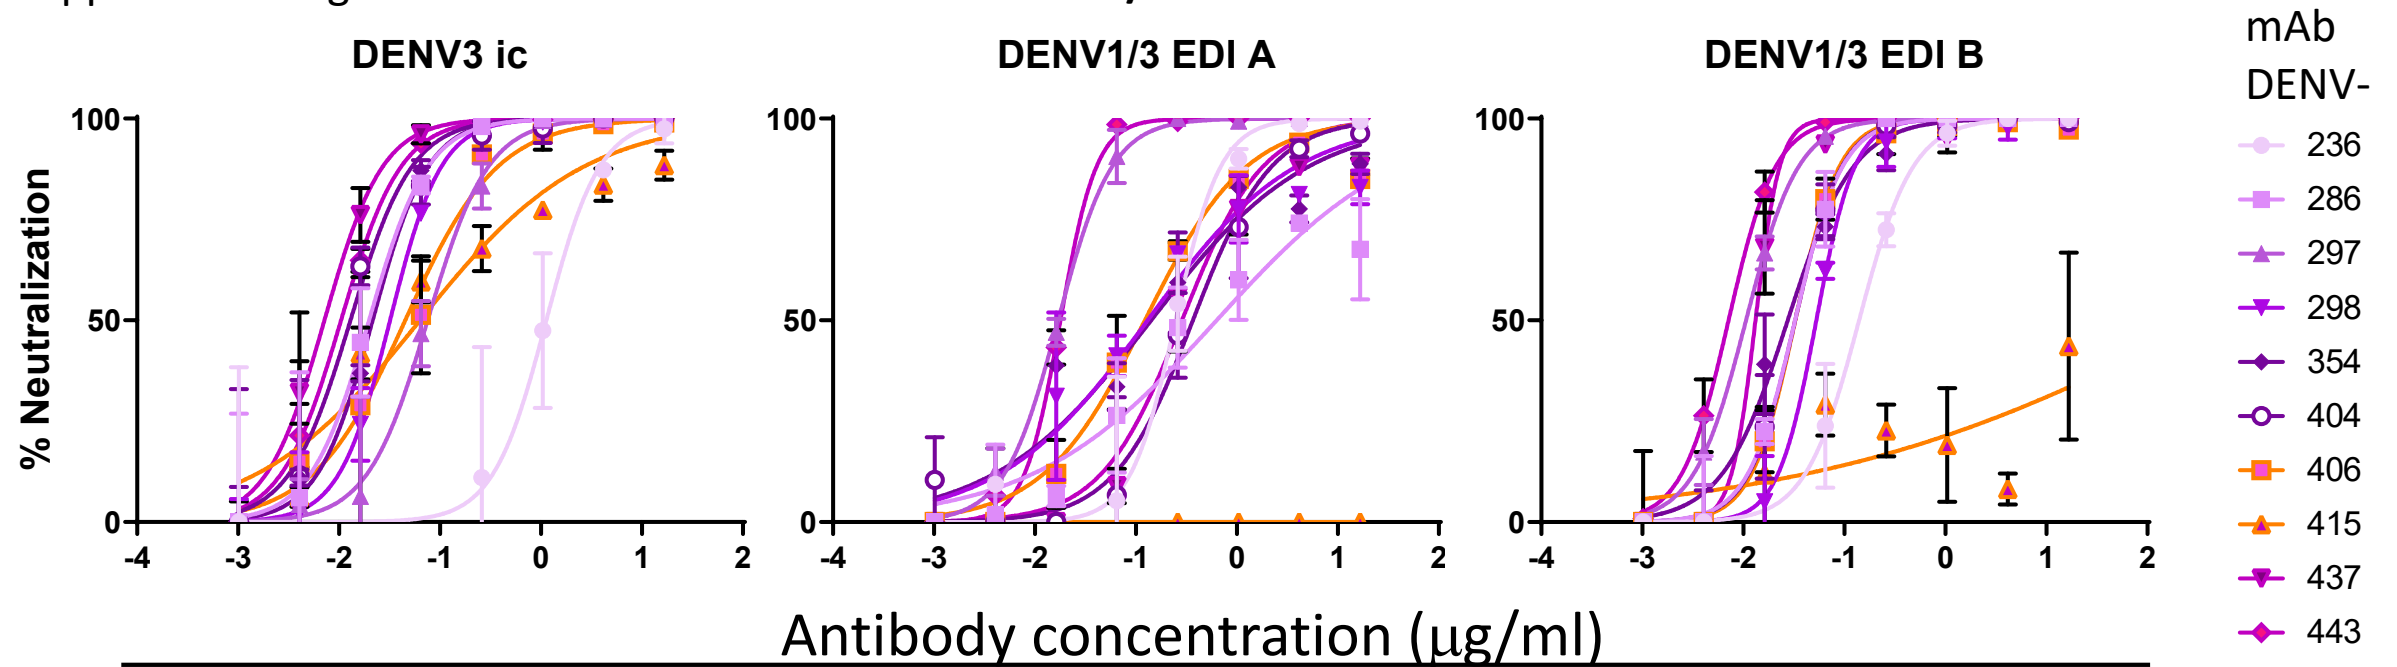

**Figure S3. Neutralization curves for DENV1/3 chimeric viruses. Related to Figure 4.**

Vero-81 FRNT neutralization curves for parental DENV3 ic and chimeric DENV1/3 EDI-A and DENV1/3 EDI B are shown. Neutralization curves for DENV1/3 EDI B are very similar to neutralization curves for the parental DENV3, indicating a similar interaction of the hmAbs with DENV1/3 EDI B, whereas neutralization curves for DENV1/3 EDI A show reduced slopes. It is interesting that sequence analysis of hmAb variable region genes found that the group 1 EDI antibodies fall into three categories of binding interfaces defined by LOF, GOF and genotype-exchange studies using neutralization assays. Sequence analysis revealed that the group 1b hmAb DENV-236 and -297 have similar heavy chains, even though they originated in two separate individuals. Moreover, these mAbs are also the only two DENV3 hmAbs that neutralized the chimeric DENV1/3 EDI recombinant viruses significantly better than they did the parental DENV3 viruses (**Figure 3**). These mAbs are also the only two hmAbs in the panel that bound equally well to monomeric or dimeric recE and showed an inability to neutralize DENV3 G-IV (**Figure 4C**). These shared characteristics may be a result of their similar heavy chains.

# Supplemental Fig 4 - Monomer/dimer DENV3 E glycoprotein ELISA.

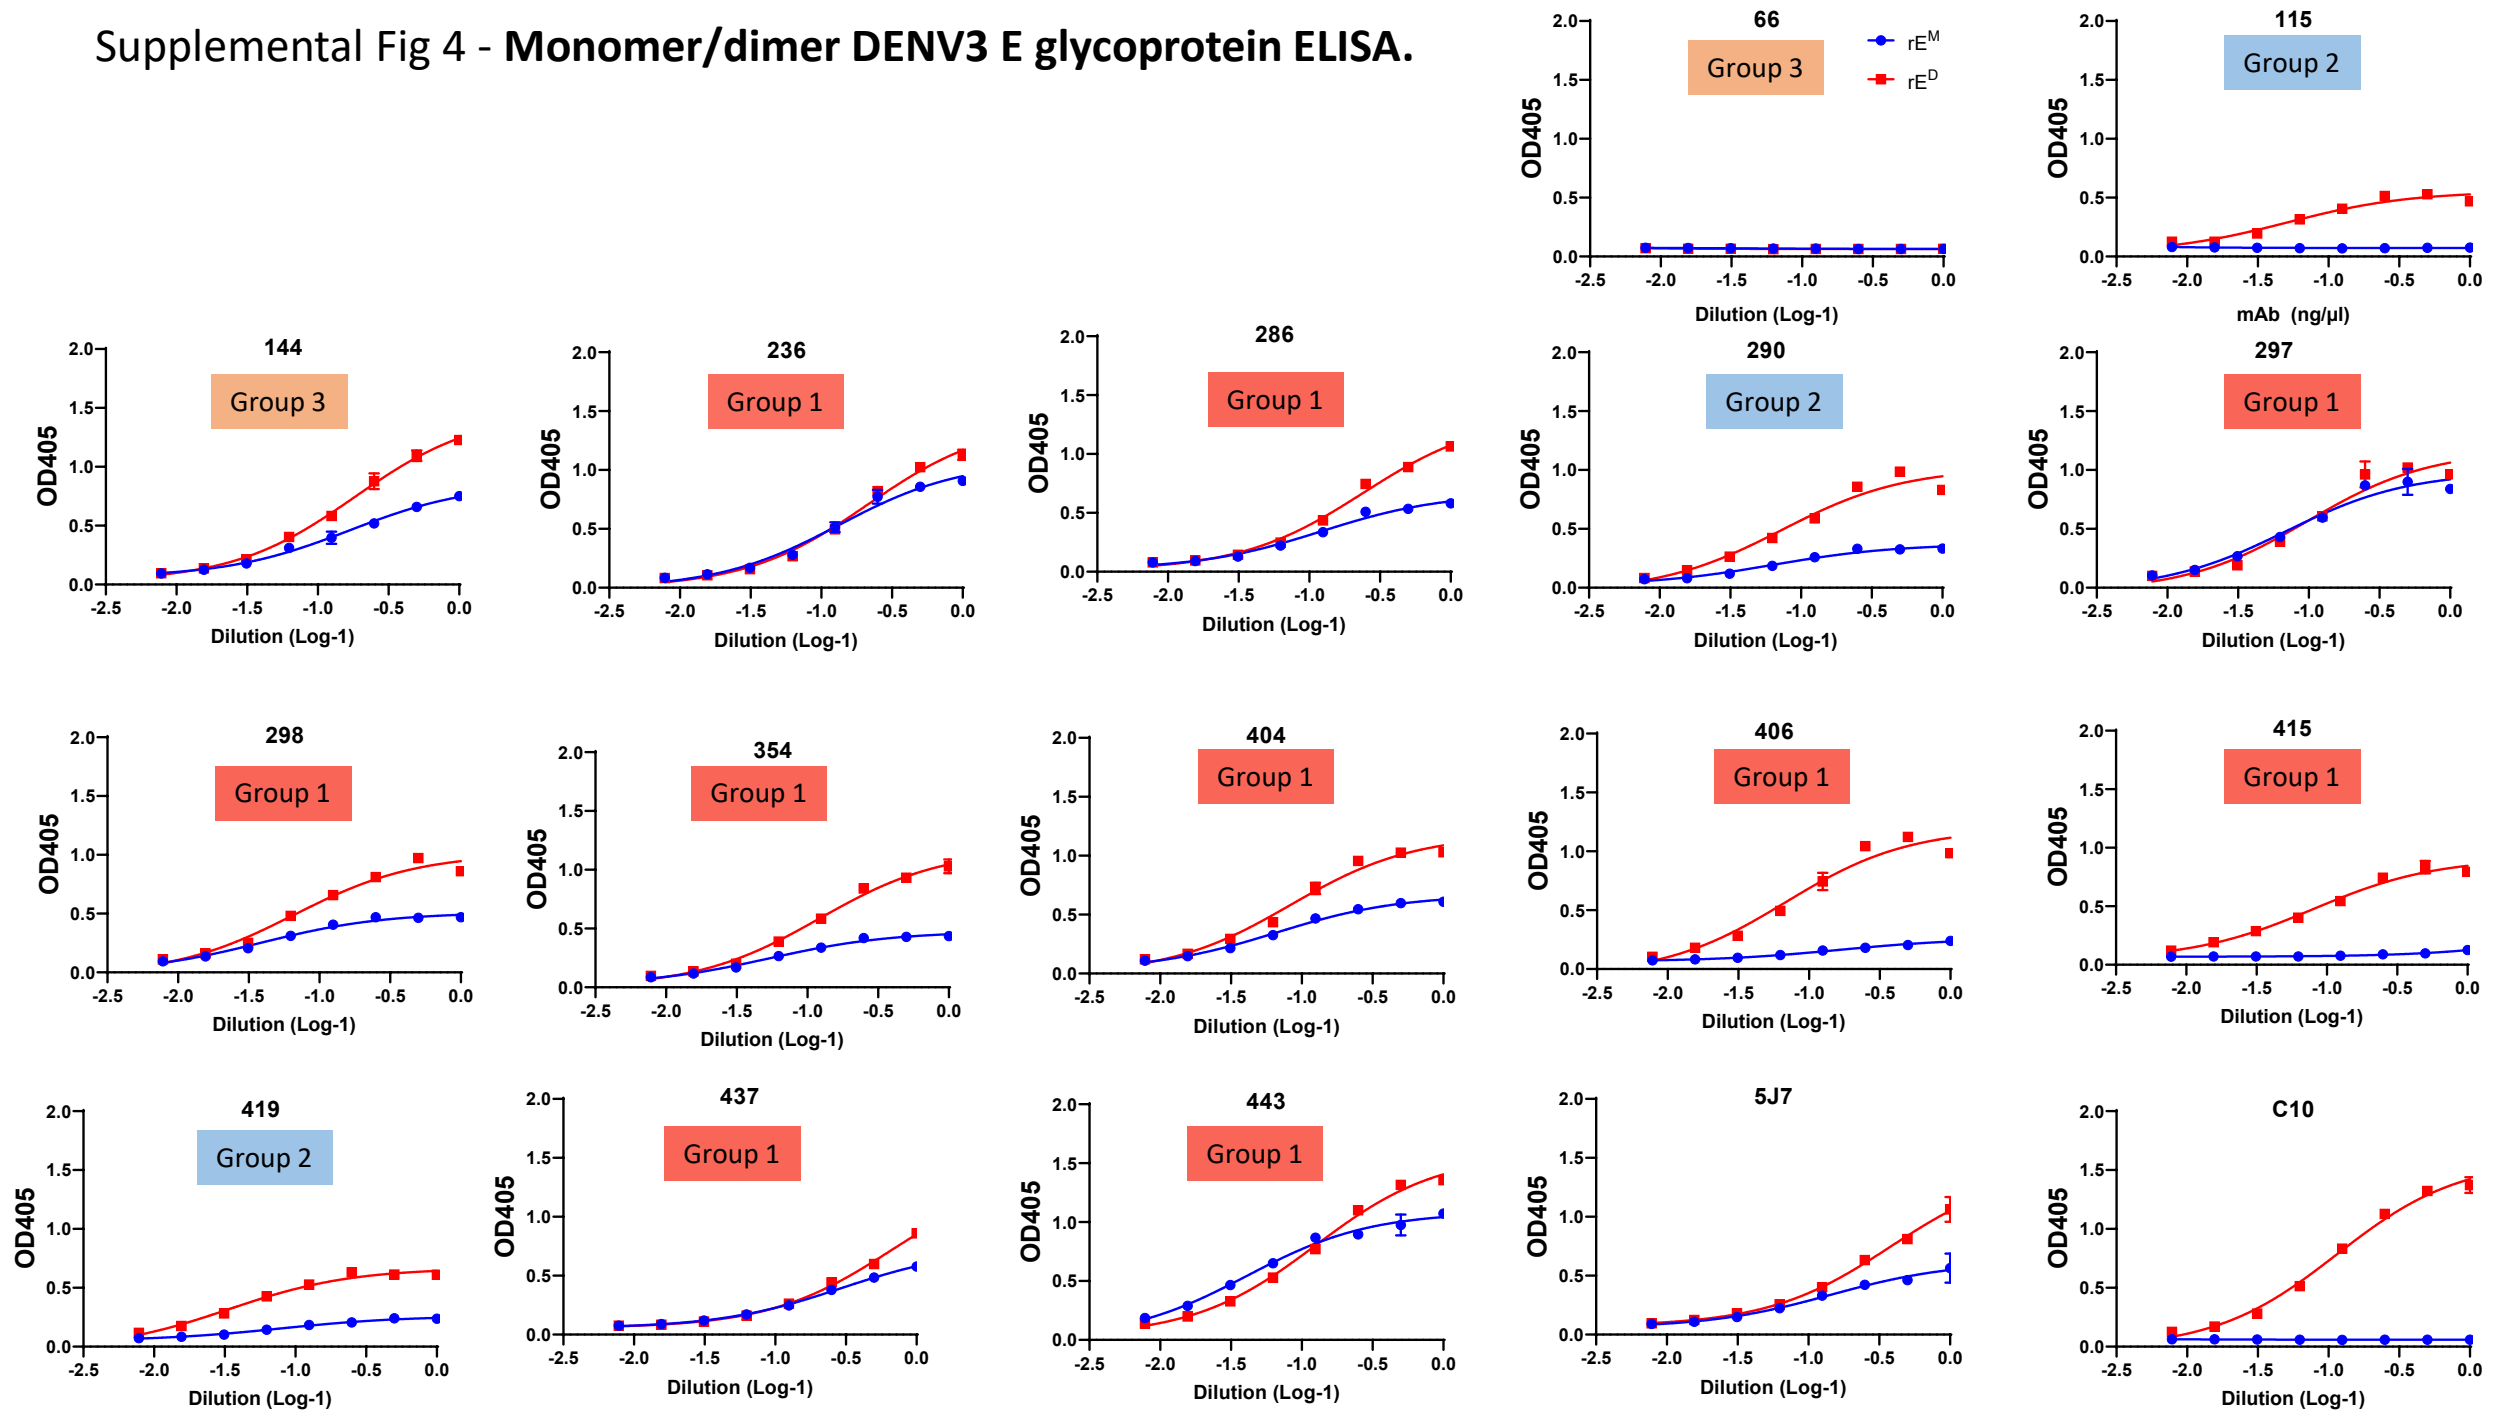

## Figure S4. Monomer/dimer DENV3 E glycoprotein ELISA. Related to Virus, rE and rEDIII ELISA in Star Methods Details

Binding curves for individual hmAbs to ELISA plates coated with rE monomers or stabilized rE dimers. A starting concentration of 2 ng/ $\mu$ L of hmAb was diluted 2-fold (x-axis). Bound hmAbs were detected using anti-human-IgG-alkaline phosphatase and absorbance measurement at 405 nm. In comparison to the other group 1 antibodies, hmAbs DENV-415 and -406 did not bind detectably to recE monomers but did show weak binding to recE dimers, suggesting that they recognize a quaternary epitope. Group 1a hmAbs DENV-286, -298, -354 and -404 showed weak binding to recE monomer but higher binding to recE dimers, suggesting their epitope is presented more completely by recE dimers. Group 1b hmAbs DENV-236 and -297 showed no preference for recE dimers over monomers, implying that they may recognize functional epitopes in the EDI of a single protomer. Among the remaining members of group 1, hmAb DENV-443 showed a slight preference for binding to recE dimers at higher concentrations of antibody, while hmAb DENV-437 showed a low level of binding to dimer or monomeric recE without preference, suggesting that these mAbs may recognize unique epitope configurations. In contrast, all of the group 2 hmAbs (*e.g.*, DENV-115, -290 and -419) showed a clear preference for binding to recE dimers, suggesting that they recognize quaternary epitopes. Group 3 hmAb DENV-66 did not neutralize a genotype II DENV3 virus, and consequently, did not bind recE monomers or dimers based on a genotype II E protein sequence, while the other group 3 hmAb DENV-144 preferred dimer recE and showed a similar pattern of binding as hmAb 5J7, which is known to bind a quaternary epitope. A recombinant form of the CR EDE1 epitope-specific hmAb C10 was used as a positive control, because its epitope is displayed on recE dimers and not monomers, as can be clearly seen in the binding pattern of rEDE1 C10.

**A Gain-of-Function** – DENV3 Puerto Rico backbone with Domain 1, 2 or 3 changed to Sri Lanka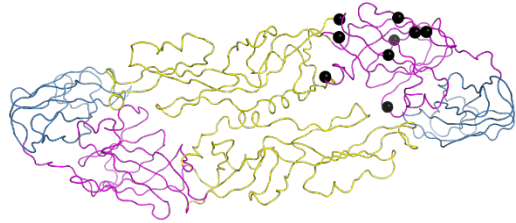

DENV3 G-IV with G-III EDI

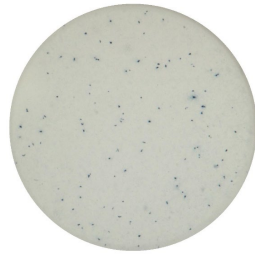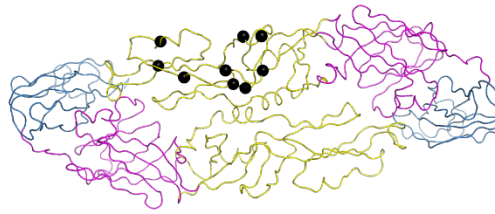

DENV3 G-IV with G-III EDII

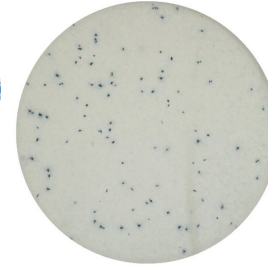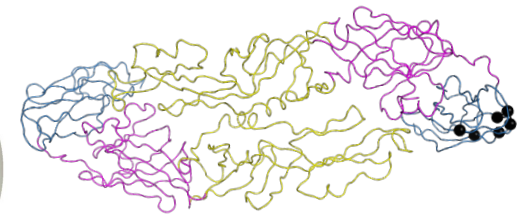

DENV3 G-IV with G-III EDIII

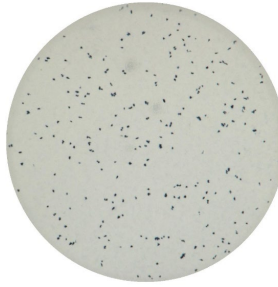

| DENV3                    | Genotype | 6 | 22 | 50 | 62 | 63 | 68 | 81 | 113 | 120 | 124 | 132 | 139 | 169 | 171 | 172 | 224 | 226 | 270 | 301 | 302 | 322 | 380 | 383 | 386 |
|--------------------------|----------|---|----|----|----|----|----|----|-----|-----|-----|-----|-----|-----|-----|-----|-----|-----|-----|-----|-----|-----|-----|-----|-----|
| Puerto Rico 1977         | IV       | V | E  | V  | G  | A  | T  | T  | S   | H   | L   | H   | I   | A   | V   | T   | A   | V   | I   | S   | G   | I   | T   | K   | R   |
| DENV3 G-IV w G-III EDI   | IV/III   | I | D  | A  | G  | A  | T  | T  | S   | H   | L   | Y   | V   | T   | A   | I   | A   | V   | N   | S   | G   | I   | T   | K   | R   |
| DENV3 G-IV w G-III EDII  | IV/III   | V | E  | V  | E  | G  | I  | V  | L   | Q   | P   | H   | I   | A   | V   | T   | T   | T   | I   | S   | G   | I   | T   | K   | R   |
| DENV3 G-IV w G-III EDIII | IV/III   | V | E  | V  | G  | A  | T  | T  | S   | H   | L   | H   | I   | A   | V   | T   | A   | V   | I   | T   | N   | V   | I   | N   | K   |
| Sri Lanka 1989           | III      | I | D  | A  | E  | G  | I  | V  | L   | Q   | P   | Y   | V   | T   | A   | I   | T   | T   | N   | T   | N   | V   | I   | N   | K   |
| domain                   |          | I |    |    | II |    |    |    |     |     | I   |     |     | II  |     |     | III |     |     |     |     |     |     |     |     |

**B Loss-of-Function** – DENV3 Sri Lanka backbone with Domain 1, 2 or 3 changed to Puerto Rico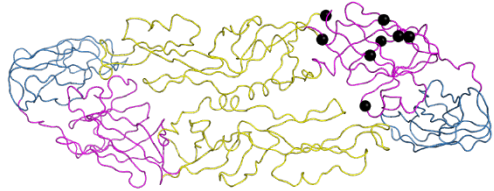

DENV3 G-III with G-IV EDI

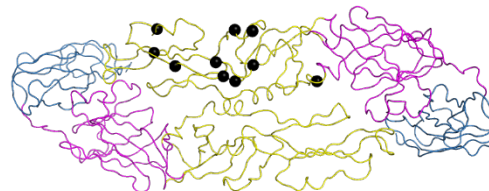

DENV3 G-III with G-IV EDII

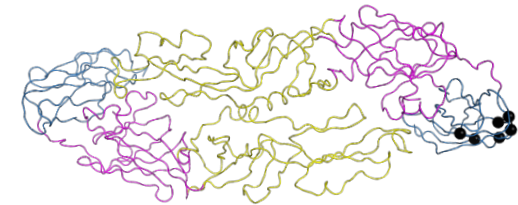

DENV3 G-III with G-IV EDIII

| DENV3                    | Genotype | 6 | 22 | 50 | 62 | 63 | 68 | 81 | 113 | 120 | 124 | 132 | 139 | 169 | 171 | 172 | 224 | 226 | 270 | 301 | 302 | 322 | 380 | 383 | 386 |
|--------------------------|----------|---|----|----|----|----|----|----|-----|-----|-----|-----|-----|-----|-----|-----|-----|-----|-----|-----|-----|-----|-----|-----|-----|
| Sri Lanka 1989           | III      | I | D  | A  | E  | G  | I  | V  | L   | Q   | P   | Y   | V   | T   | A   | I   | T   | T   | N   | T   | N   | V   | I   | N   | K   |
| DENV3 G-III w G-IV EDI   | III/IV   | V | E  | V  | E  | G  | I  | V  | L   | Q   | P   | H   | I   | A   | V   | T   | T   | T   | N   | T   | N   | V   | I   | N   | K   |
| DENV3 G-III w G-IV EDII  | III/IV   | I | D  | A  | G  | A  | T  | T  | S   | H   | L   | Y   | V   | T   | A   | I   | A   | V   | I   | T   | N   | V   | I   | N   | K   |
| DENV3 G-III w G-IV EDIII | III/IV   | I | D  | A  | E  | G  | I  | V  | L   | Q   | P   | Y   | V   | T   | A   | I   | T   | T   | N   | S   | G   | I   | T   | K   | R   |
| Puerto Rico 1977         | IV       | V | E  | V  | G  | A  | T  | T  | S   | H   | L   | H   | I   | A   | V   | T   | A   | V   | I   | S   | G   | I   | T   | K   | R   |
| domain                   |          | I |    |    | II |    |    |    |     |     | I   |     |     | II  |     |     | III |     |     |     |     |     |     |     |     |



**Figure S5. Gain-of-function and loss-of-function genotype domain-swap chimeras. Related to Figures 5 and 6.**

**A)** Gain-of-Function DENV3 genotype chimeric viruses. DENV3 G-IV backbone with EDI, EDII or EDIII changed to G-III. PyMOL software representations of gain-of-function viruses. Transferred residues from a DENV3 Sri Lanka strain are designated by black spheres on a DENV3 Puerto Rico strain backbone. Foci at 48 hours on Vero-81 cells are shown. Amino acid alignment of changes residues are shown. Puerto Rico DENV3 residues are shown in purple and Sri Lanka DENV3 residues are shown in blue. Domain map of residues is shown in gray.

**B)** Loss-of-Function DENV3 genotype chimeric viruses. DENV3 G-III backbone with EDI, EDII or EDIII changed to G-IV. PyMOL software representations of loss-of-function viruses. Transferred residues from Puerto Rico DENV3 are designated by black spheres on a Sri Lanka DENV3 backbone. Amino acid alignment of changes residues are shown. Puerto Rico DENV3 residues are shown in purple and Sri Lanka DENV3 residues are shown in blue. Domain map of residues is shown in gray.
